# Supplementary material
Source: PubMed Central journal article supplement (PMC7108193)
Supplement: figures.pdf [file figures.pdf]

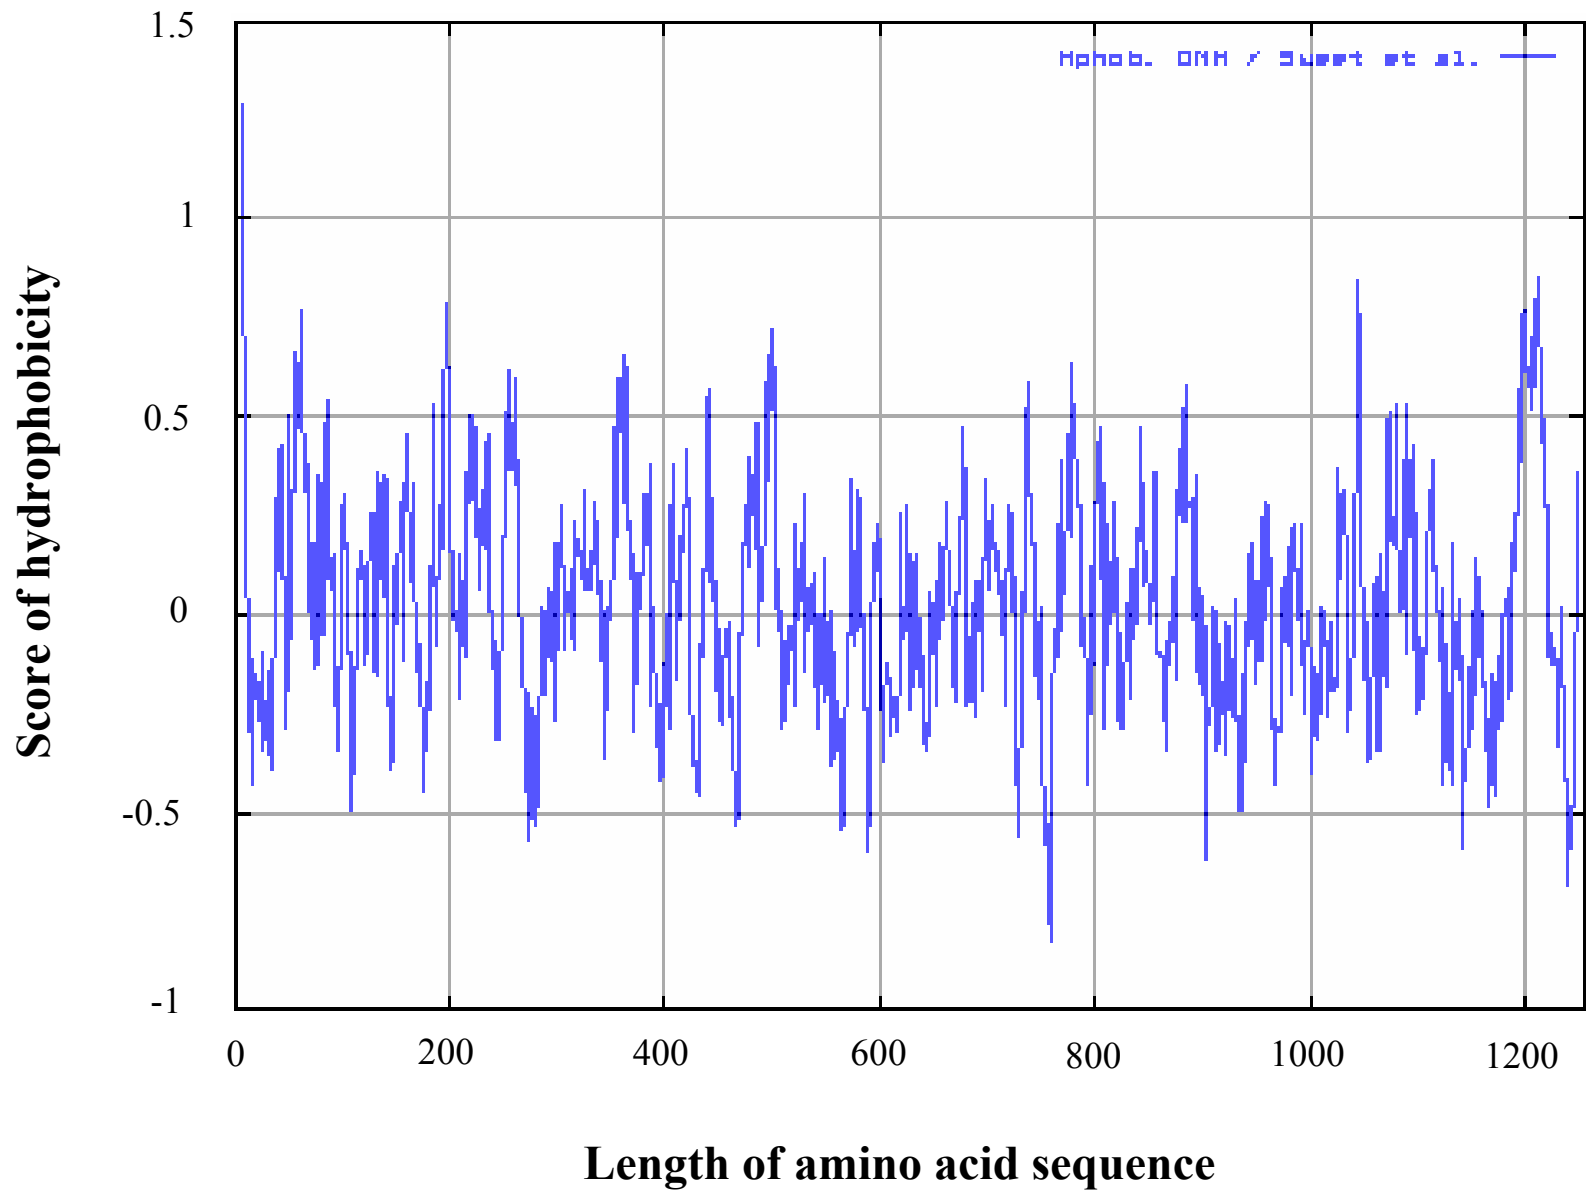

Supplemental figure 1. The hydrophobicity plot of SARS-coronavirus structural protein S.

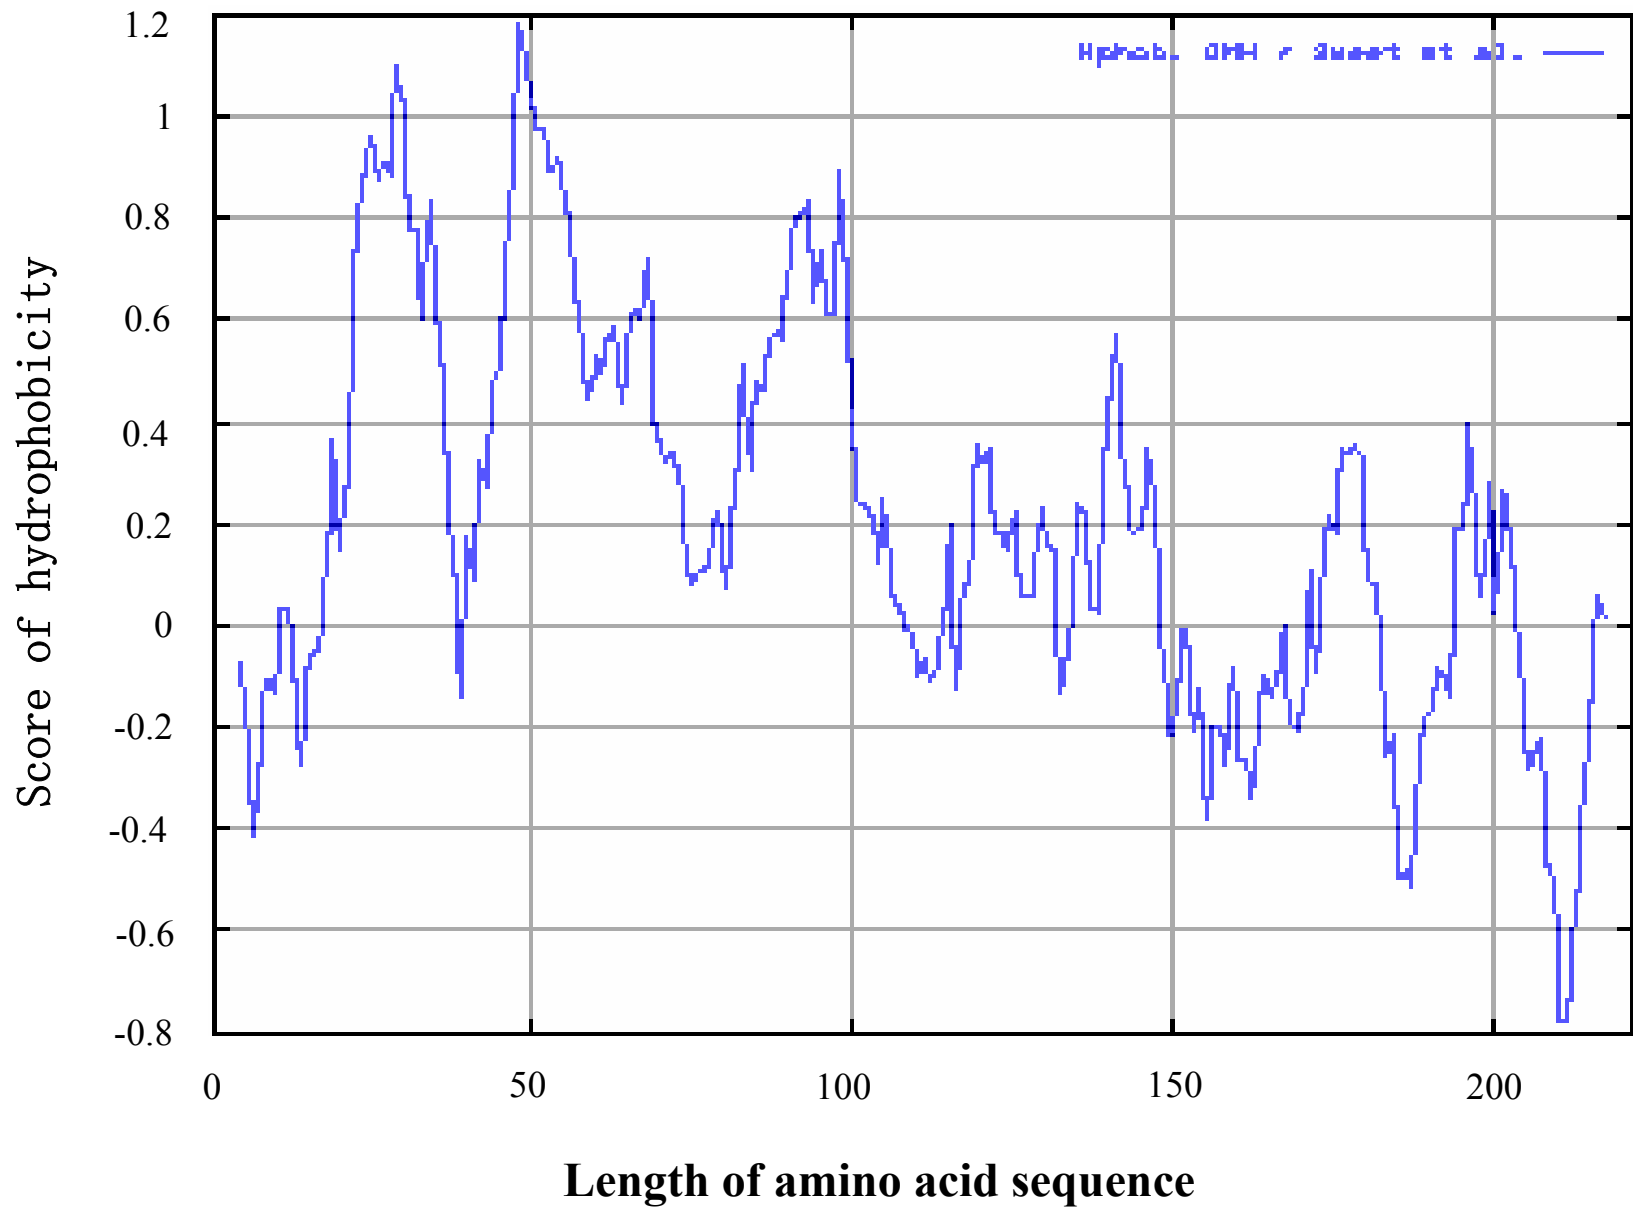

Supplemental figure 2. The hydrophobicity plot of SARS-coronavirus structural protein M.

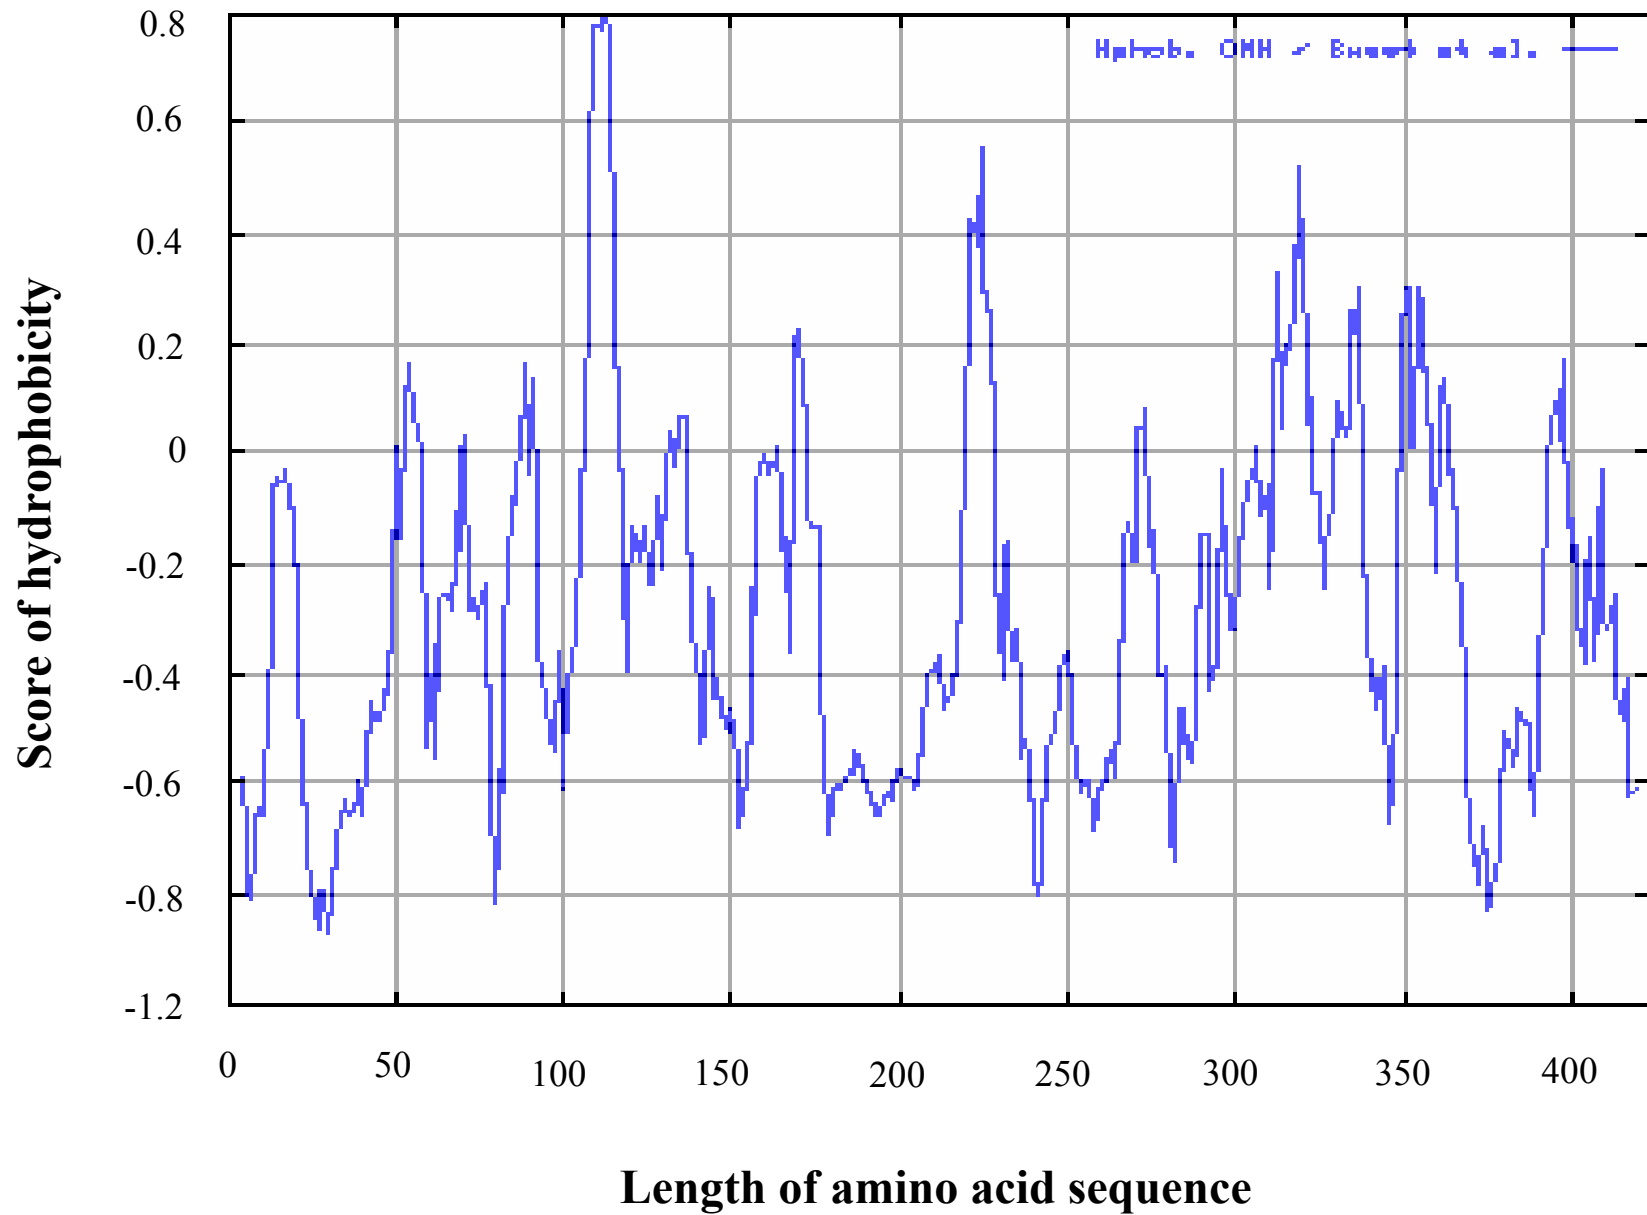

Supplemental figure 3. The hydrophobicity plot of SARS-coronavirus structural protein N.
